# Supplementary material for: An Adaptation and Validation of Students’ Satisfaction Scale: The Case of McGraw–Hill Education Connect
Source: Hindawi journal article supplement (doi:10.1155/2021/1936076), 2021-06-26
Supplement: f1 [file 1936076.f1.docx]

**Appendix A**

**The initial items and subscales:**

| No. | Item |
| --- | --- |
|  | Satisfaction |
| 1 | I am satisfied with Connect |
| 2 | I would like to take a similar course if it utilizes Connect |
| 3 | Connect did not meet my learning needs |
| 4 | I would recommend others to take courses which use Connect |
| 5 | I was not satisfied with my Connect experience. |
|  | Effectiveness |
| 6 | With Connect I learned more in this online course as compared to a face-to-face course |
| 7 | Connect encouraged me to rethink my understanding of some aspects of the subject matter after completing Connect modules. |
| 8 | While using Connect, examples and illustrations were given to help me to grasp things better. |
| 9 | While using Connect, I was prompted to think about how I could develop my learning. |
| 10 | Completing Connect modules helped to direct my learning. |
| 11 | Connect modules clarified expectations of what is required to be understood to get good marks |
| 12 | The Connect modules used in this course facilitated my learning |
| 13 | Receiving feedback on Connect modules helped me to determine areas of deficiency |
| 14 | Preparation for graded quizzes in this course facilitated my learning |
| 15 | Online quizzes embedded in Connect better helped me to understand my level of comprehension |
| 16 | Online quizzes embedded in Connect helped to direct my studying and learning. |
| 17 | Connect helped me to come to class prepared |
| 18 | Connect facilitated my interaction in course discussions |
| 19 | I used Connect to cover course content before it was discussed in class. |
| 20 | Connect was mainly a tool for reviewing and studying past material. |
| 21 | Connect allowed me to be more interactive during class time. |
|  | Usability |
| 22 | From the start, Connect made clear to me what I was supposed to learn in this unit. |
| 22* | From the start, my professor made clear to me how I was supposed to learn from Connect. |
| 23 | The amount of work required for Connect modules was appropriate |
| 24 | Connect allowed me to access online/digital learning resources readily. |
| 25 | Connect helped me to learn without regular face-to-face contact. |
| 26 | Connect allowed me to be responsible for my own learning. |
| 27 | I used Connect to help me Commission my strengths and weaknesses. |
| 28 | Connect helped me to learn more efficiently by showing me what I needed to focus on. |
| 29 | Connect helped me to focus my attention on specific areas of need. |

* item removed earlier based on reviewers' feedback

**Appendix B**

**The validated survey items and constructs:**

| No | Item |
| --- | --- |
|  | Satisfaction |
| 1 | I am satisfied with Connect |
| 2 | I would like to take a similar course if it utilizes Connect |
| 4 | I would recommend others to take courses which use Connect |
|  | Effectiveness |
| 6 | With Connect I learned more in this online course as compared to a face-to-face course |
| 7 | Connect encouraged me to rethink my understanding of some aspects of the subject matter after completing Connect modules. |
| 8 | While using Connect, examples and illustrations were given to help me to grasp things better. |
| 12 | The Connect modules used in this course facilitated my learning |
| 27 | I used Connect to help me Commission my strengths and weaknesses. |
| 14 | Preparation for graded quizzes in this course facilitated my learning |
| 15 | Online quizzes embedded in Connect better helped me to understand my level of comprehension |
| 16 | Online quizzes embedded in Connect helped to direct my studying and learning. |
| 9 | While using Connect, I was prompted to think about how I could develop my learning. |
| 17 | Connect helped me to come to class prepared |
| 18 | Connect facilitated my interaction in course discussions |
| 19 | I used Connect to cover course content before it was discussed in class. |
|  | Usability |
| 11 | Connect modules clarified expectations of what is required to be understood to get good marks |
| 22 | From the start, Connect made clear to me what I was supposed to learn in this unit. |
| 23 | The amount of work required for Connect modules was appropriate |
| 24 | Connect allowed me to access online/digital learning resources readily. |
| 26 | Connect allowed me to be responsible for my own learning. |
| 28 | Connect helped me to learn more efficiently by showing me what I needed to focus on. |
| 29 | Connect helped me to focus my attention on specific areas of need. |
